# Supplementary material
Source: Elsevier journal article supplement (https://www.sciencedirect.com/science/article/pii/S0211699521002848)
Supplement: mmc1 [file S0211699521002848:mmc1.doc]

**Tabla suplementaria 1.** Factores asociados a la pérdida de injerto

|  | Análisis univariante | | Análisis multivariante | |
| --- | --- | --- | --- | --- |
|  | HR (IC95%) | p | HR (IC95%) | p |
| *Características de los receptores* | | | |  |
| Edad (años)  Género (ref: mujer)  Raza (ref: caucásica)  Diabetes mellitus (ref: no)  Etiología de la ERC (ref: dibética)  Patología CV pretrasplante   - Cardiopatía isquémica (ref: no) - ACV (ref: no) - Arteropatía periférica (ref: no)   Retrasplantes (ref: no) | 0.99 (0.99-1.004)  0.79 (0.66-0.95)  1.27 (0.65-2.46)  1.26 (0.97-1.65)  0.96 (0.6-1.40)  0.88 (0.58-1.32)  1.03 (0.63-1.65)  1.11 (0.89-1.39)  0.98 (0.57-1.28) | 0.51  **0.014**  0.47  0.08  0.87  0.54  0.90  0.32  0.92 | 0.99 (0.77-1.26) | 0.95 |
| *Características de los donantes* | | | |  |
| Edad (años)  Género (ref: mujer)  Tipo donante (ref: vivo)   - Muerte encefálica - Asistolia no controlada - Asistolia controlada   Hipertensión arterial (ref: no)  Diabetes mellitus previa (ref: no)  Donante con criterios expandidos (ref: donante óptimo)  Creatinina del donante (mg/dl) | 1.011 (1.005-1.016)  0.64 (0.18-2.57)  1.24 (0.91-1.61)  4.18 (2.38-7.36)  1.22 (0.80-1.82)  1.68 (1.33-2.11)  1.65 (1.13-2.41)  1.73 (1.41-2.11)  0.96 (0.76-1.28) | **<0.001**  0.53  0.15  **<0.001**  0.34  **<0.001**  **0.008**  **<0.001**  0.44 | 1.010 (1.00-1.019)  1.94 (0.98-3.69)  1.09 (0.90-2.05)  1.36 (0.90-2.05) | **0.04**  0.06  0.13  0.53 |
| *Características del trasplante* | | | |  |
| Tiempo de isquemia fría (h)  Tratamiento de inducción (ref: antiCD-25)   - Antilinfocitarios - Sin tratamiento de inducción   Función retrasada del injerto (ref: no) | 1.00 (0.99-1.01)  1.43 (1.15-1.78)  1.14 (0.89-1.43)  1.28 (1.06-1.54) | 0.95  **0.01**  0.30  **0.009** | 1.2 (0.67-1.37)  1.23 (0.96-1.58) | 0.83  0.09 |
| Época de trasplante (ref: 1979-1999) | 1.64 (1.35-2.00) | **<0.001** | 1.40 (0.94-2.08) | 0.95 |

*Ref: referencia; ERC: enfermedad renal crónica; CV: cardiovascular; ACV: accidente cerebrovascular; RIQ: rango intercuartílico; h: horas; HR: hazard ratio; IC: intervalo de confianza*
